# Supplementary material for: Consistency of metagenomic assignment programs in simulated and real data
Source: PubMed Central journal article supplement (PMC3986635; doi:10.1186/1471-2105-15-90), 2014-03-28

Sim – All genomes – True positives

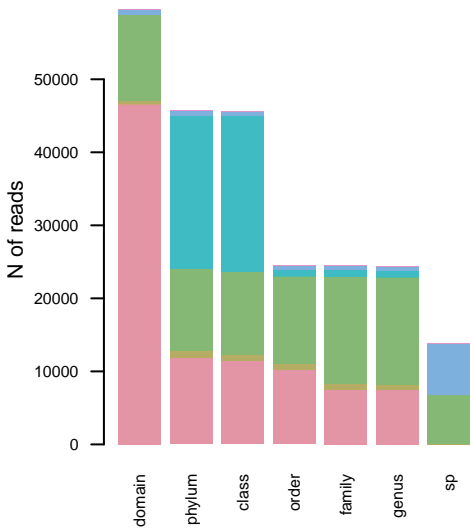

Sim – All genomes – False positives

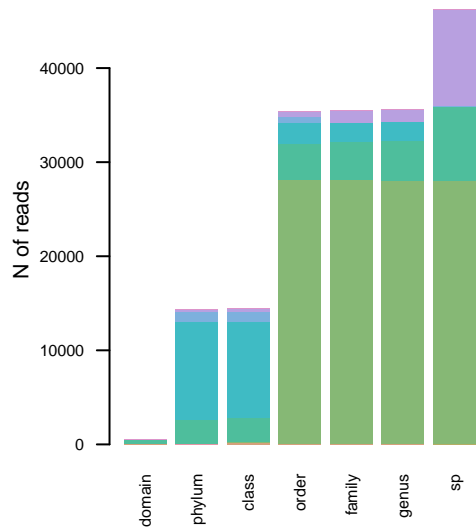

Sim – All genomes (Dominant) – True positives

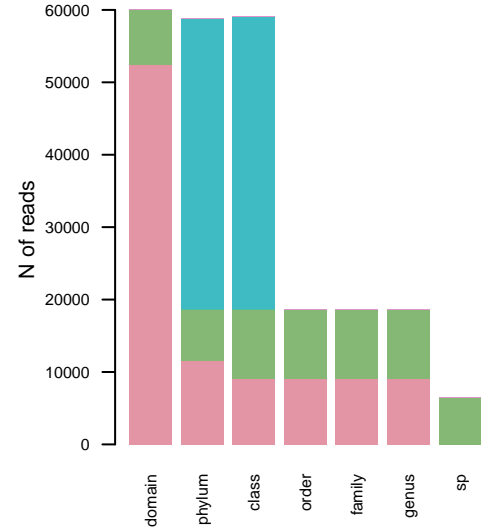

Sim – All genomes (Dominant) – False positives

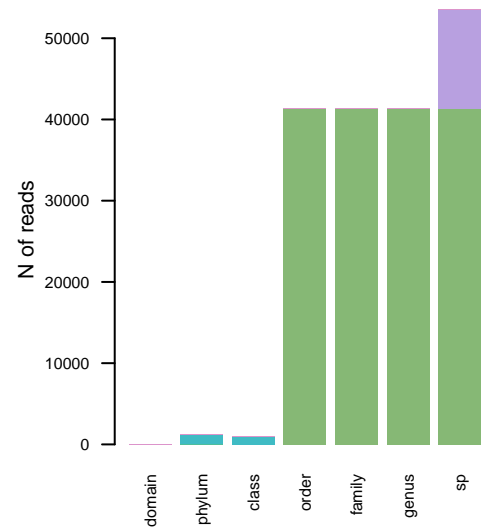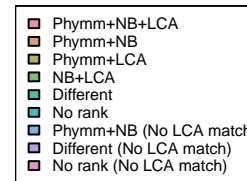

Sim – Bacterial genomes – True positives

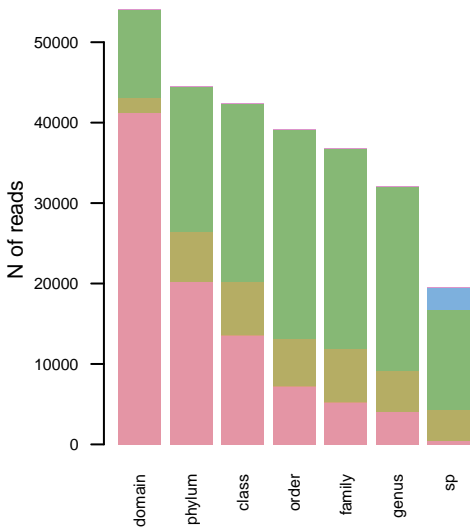

Sim – Bacterial genomes – False positives

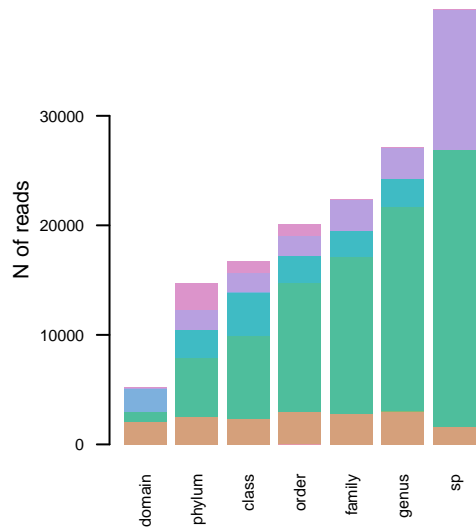

Sim – Bacterial genomes (Dominant) – True positives

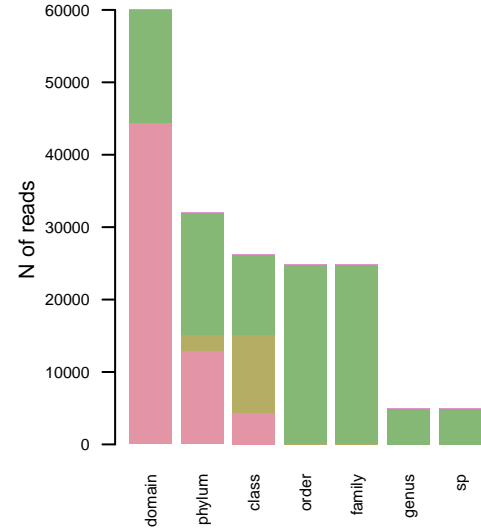

Sim – Bacterial genomes (Dominant) – False positives

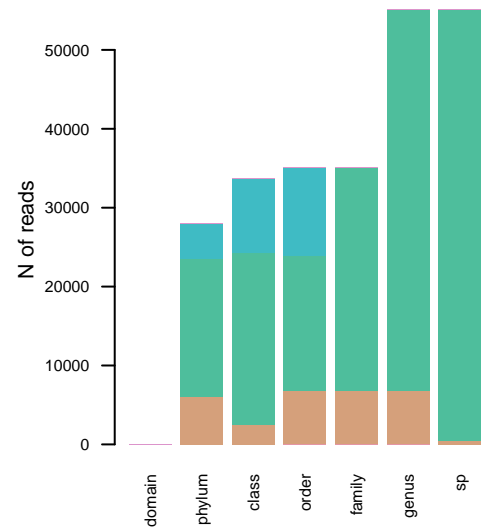

Supplement: 1471-2105-15-90-S2.pdf [file 1471-2105-15-90-S2.pdf]
