# Supplementary material for: Consistency of metagenomic assignment programs in simulated and real data
Source: PubMed Central journal article supplement (PMC3986635; doi:10.1186/1471-2105-15-90), 2014-03-28

**MetaSim 1**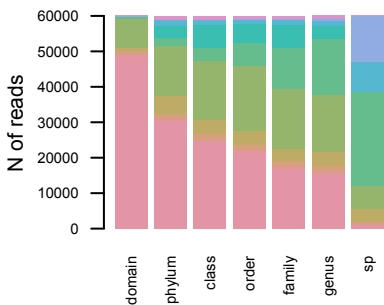**MetaSim 2**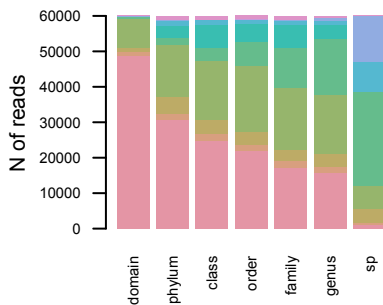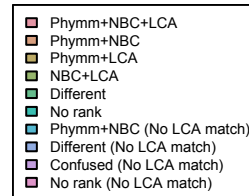**MetaSim 3**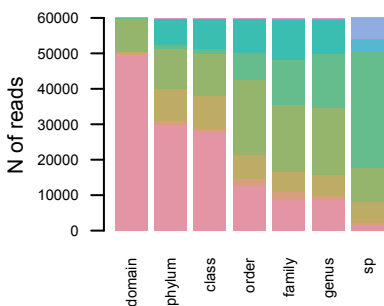**MetaSim 4**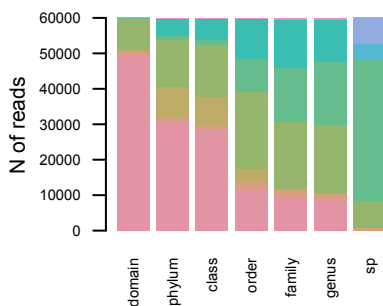**iMESS 1**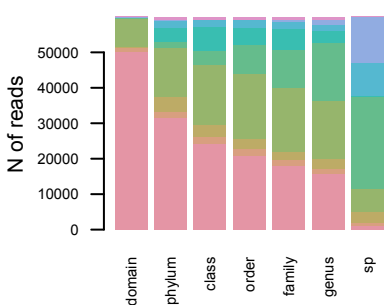**iMESS 2**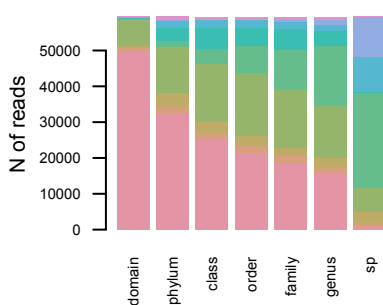

Supplement: 1471-2105-15-90-S3.pdf [file 1471-2105-15-90-S3.pdf]
